# Supplementary material
Source: Springer Nature journal article supplement (https://www.springermedizin.de/resource/supplementary/12968_2010_980_MOESM1_ESM.pdf/9580090)

left anterior

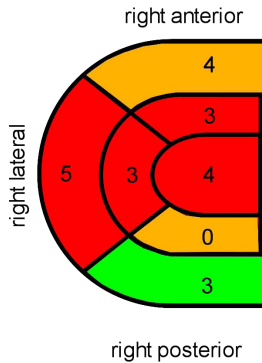

septum

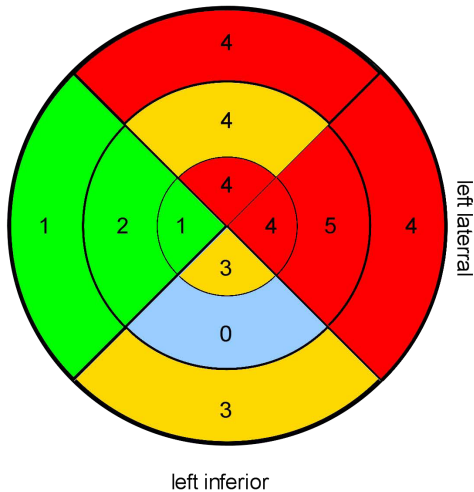

(A)

(B)

Supplement: MOESM1 [file 9580090]
